# Supplementary material for: Naringin ameliorates liver fibrosis in zebrafish by modulating IDO1-mediated lipid metabolism and inflammatory infiltration
Source: Royal Society of Chemistry journal article supplement (doi:10.1039/d3fo03858k), 2023-01-01
Supplement: d3fo03858k3.pdf [file d3fo03858k3.pdf]

## 1 Supplementary material

### 2 1. Toxicology of naringin in Zebrafish Larvae.

3 The toxicology of naringin was evaluated by counting the survival rate, heart rate, body length,  
4 morphology and liver changes of zebrafish larvae immersed in naringin of different  
5 concentrations. The zebrafish (5 dpf) were treated with naringin for 72 h. Within the designed  
6 concentration range, no abnormality in morphology, body length, liver development and survival  
7 rate were observed in the zebrafish larva (Fig. S1 A, B, D). This indicated that naringin had no toxic  
8 effect during the development of zebrafish. It is worth noting that in the heart rate test, 100  $\mu\text{g}/\text{ml}$   
9 naringin had significant effect on heart rate of zebrafish larvae (Fig. S1C). According to the  
10 preliminary research results, we found that naringin was safe. Then, we chose 15, 30, 60  $\mu\text{g}/\text{ml}$   
11 naringin for the next experiment.

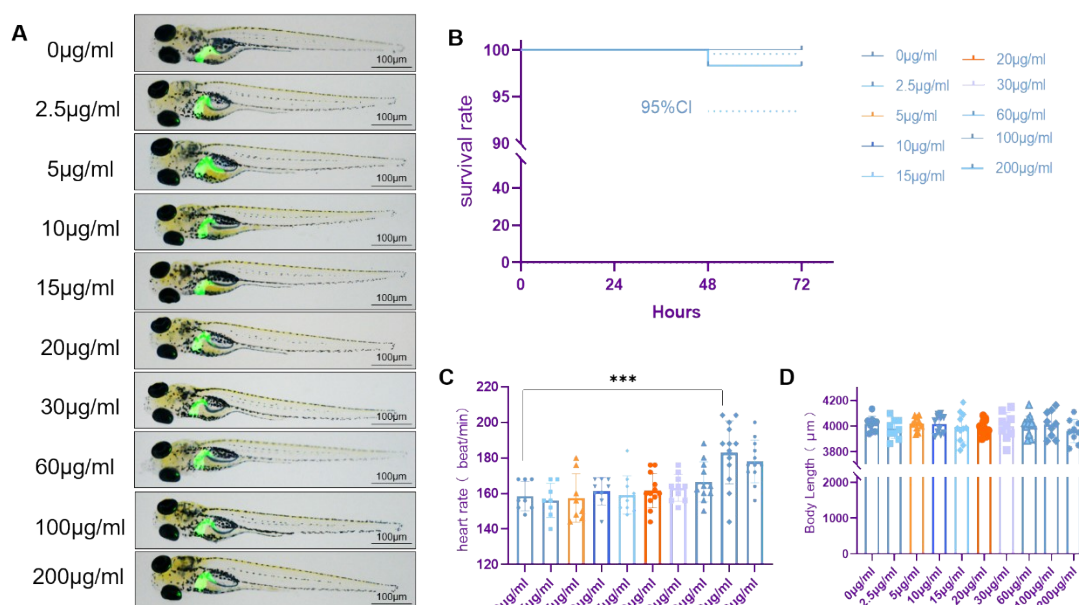

12

13 Figure S1. Toxicology of naringin in Zebrafish Larvae. (a) The effect of zebrafish larvae exposed to different  
14 concentrations of naringin for 72 h on zebrafish larval morphology and liver development ( $n = 6$ ). Figures are  
15 magnified as  $\times 20$ . (b) The effect of different concentrations of naringin on the survival rate of zebrafish larvae ( $n =$   
16 40). (c) Heart rates of zebrafish larvae exposed to different concentrations of naringin ( $n = 8$ ). (d) The body length  
17 of zebrafish larvae exposed to different concentrations of naringin ( $n = 8$ ). \*\*\* $p < 0.001$ .

18
