# Supplementary figures and images for: Naringin ameliorates liver fibrosis in zebrafish by modulating IDO1-mediated lipid metabolism and inflammatory infiltration
Source: Royal Society of Chemistry journal article supplement (doi:10.1039/d3fo03858k), 2023-01-01

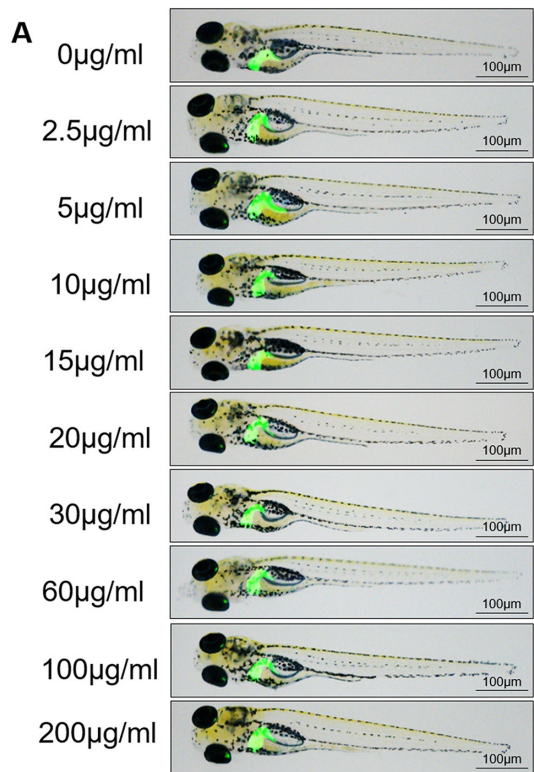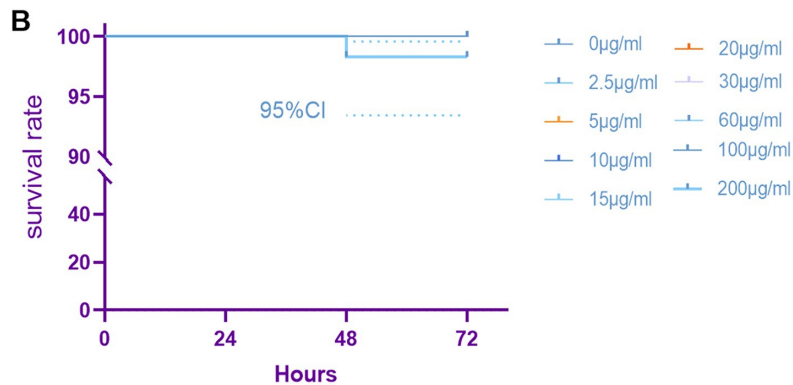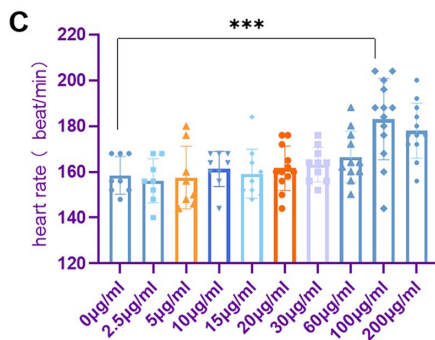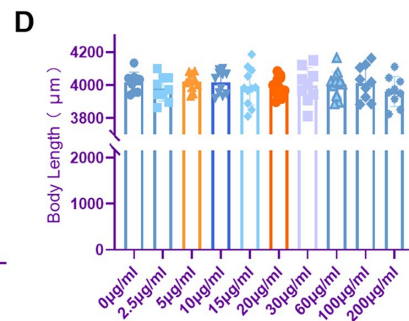

Supplement: d3fo03858k2.pdf [file d3fo03858k2.pdf]
